# Supplementary material
Source: Springer Nature journal article supplement (https://www.springermedizin.de/resource/supplementary/12943_2009_643_MOESM4_ESM.pdf/9554468)

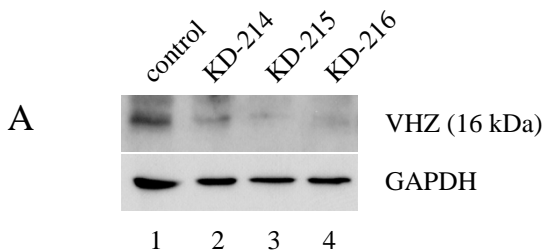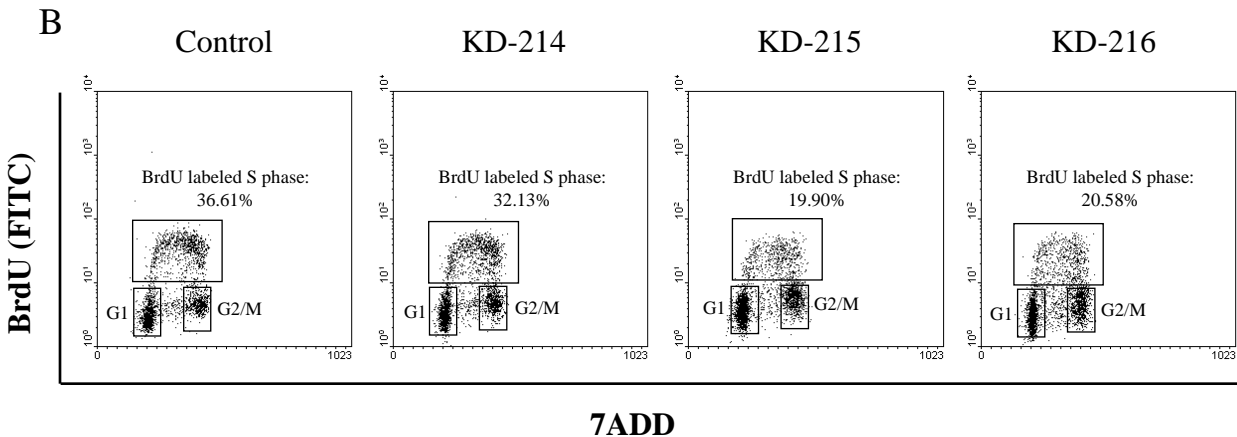

**C**

|         | control | KD-214 | KD-215 | KD-216 |
|---------|---------|--------|--------|--------|
| G1      | 36.89%  | 37.30% | 46.05% | 40.51% |
| S(BrdU) | 35.61%  | 32.13% | 19.90% | 20.58% |
| G2/M    | 20.07%  | 22.32% | 26.32% | 26.88% |

Supplement: MOESM4 [file 9554468]
